# Supplementary material for: Pectin methylesterase NaPME1 contributes to the emission of methanol during insect herbivory and to the elicitation of defence responses in Nicotiana attenuata
Source: PubMed Central journal article supplement — J Exp Bot. 2009 Apr 20;60(9):2631–40. doi: 10.1093/jxb/erp106 (PMC2692009; doi:10.1093/jxb/erp106), 2009-04-20
Supplement: erp106_1.pdf [file erp106_1.pdf]

**Pectin methylesterase NaPME1 contributes to the emission of methanol during insect herbivory and to the elicitation of defence responses in *Nicotiana attenuata***

Koerner E., von Dahl C., Bonaventure G., Baldwin I.T.

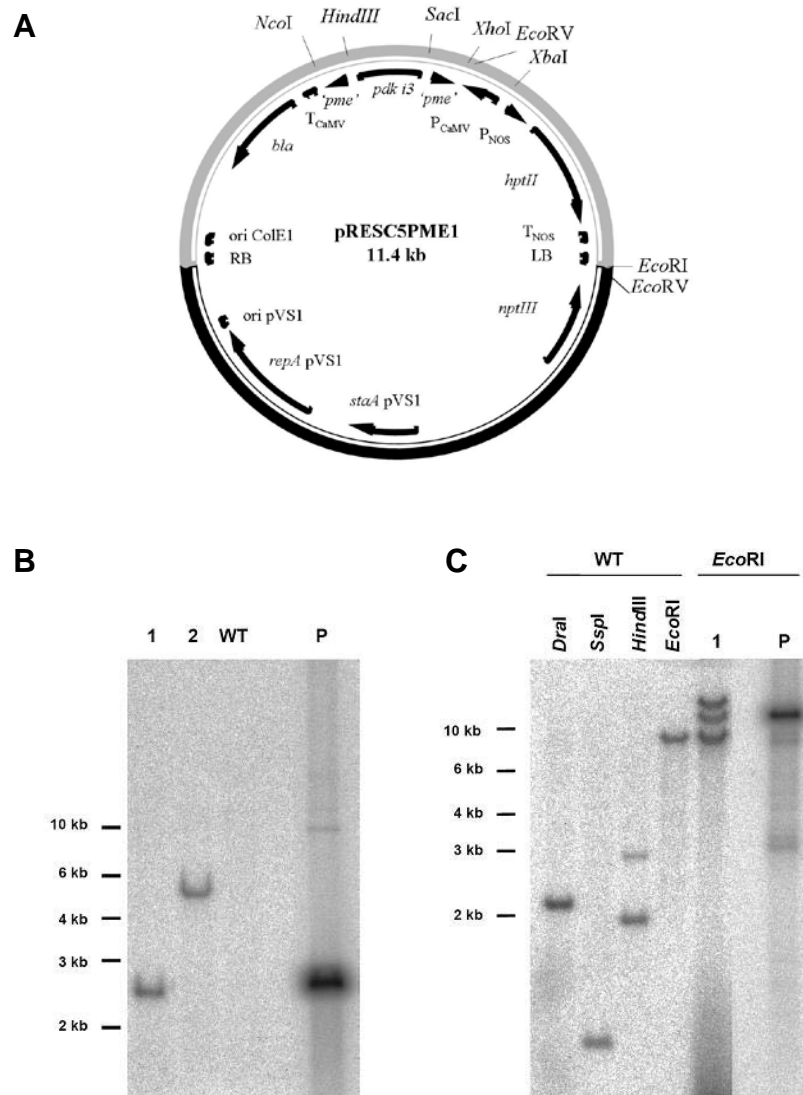

**Figure S1:**

**Plant transformation vector pRESC5PME1 and Southern blot analysis of *ir-pme* lines and WT.**

(A) *N. attenuata* plant transformation vector pRESC5PME1 used to generate transgenic *ir-pme* lines. The transferred T-DNA is shown in grey with right and left border (RB, LB). The T-DNA contains two fragments of the *N. attenuata* pectin methylesterase gene NaPME1 (*pme*) in opposite directions and the selection marker gene (*hptII*). (B), (C) Southern blot analysis of WT and *ir-pme* lines. (B) Genomic DNA of WT and both *ir-pme* lines, 434-7 (1) and 457-8 (2), and pRESC5PME1 plasmid (P) DNA were digested with *EcoRV*. The blot was hybridized with a <sup>32</sup>P-labeled probe specific for the hygromycin phosphotransferase gene *hptII*. (C) Genomic DNA of WT was digested with *DraI*, *SspI*, *HindIII* and *EcoRI*. Genomic DNA of *ir-pme* line 434-7 (1) and the pRESC5PME1 plasmid (P) were digested with *EcoRI*. The blot was hybridized with a <sup>32</sup>P-labeled probe specific for the pectin methylesterase gene NaPME1.

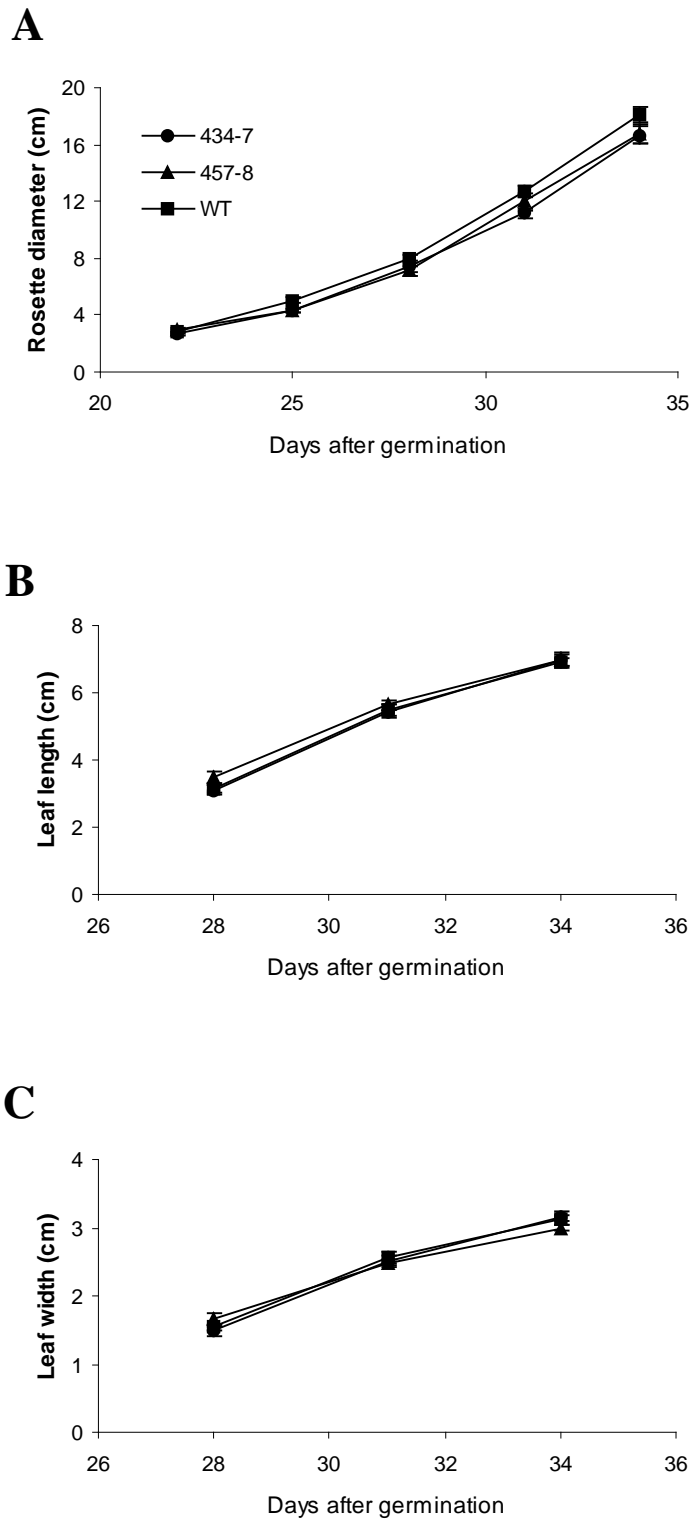

**Figure S2:**

**Growth parameters of WT and *ir-pme* lines.**

Mean ( $\pm$  SE) rosette diameter (**A**), leaf length (**B**) and leaf width (**C**) of WT plants (squares) and two transformed *ir-pme* lines, 434-7 (circles) and 457-8 (triangles) (n = 10).

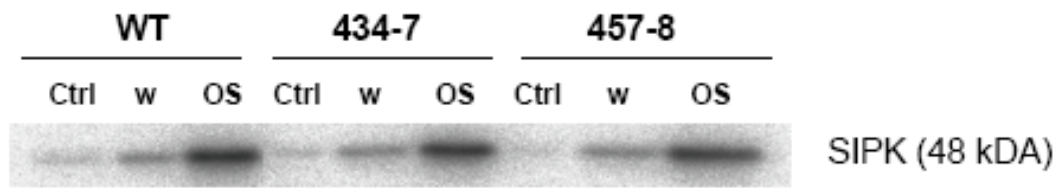

**Figure S3:**

**In-Gel MAP kinase activity assay of WT and *ir-pme* lines.**

SIPK activity in WT plants and both *ir-pme* lines (434-7, 457-8) 10 min after wounding and application of either water (w) or 1:1 diluted *M. sexta* oral secretions (OS) and in control leaves (Ctrl).

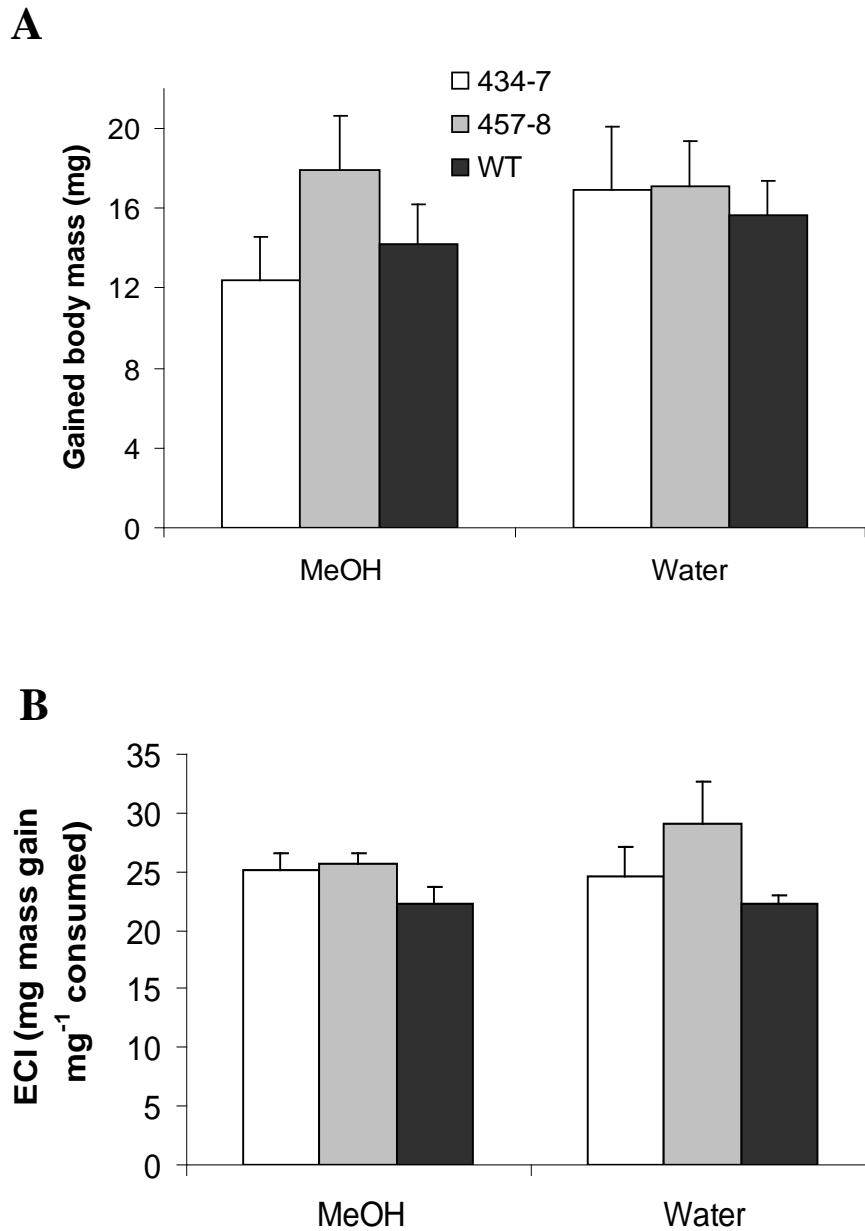

**Figure S4:**

**Nutritional indices of *M. sexta* larvae feeding on WT and *ir-pme* lines.**

Mean ( $\pm$  SE) larval dry mass (**A**) and efficiency of conversion of ingested food (ECI) (**B**) of *M. sexta* larvae after 9 days of feeding on excised leaves of WT and *ir-pme* lines. Plants were sprayed with either a 5% methanol solution or water. Spraying started 4 days before the start of the caterpillar experiment and was continued until the end of the experiment (n = 10-14).
